# Supplementary material for: The TLR7/8 agonist R848 optimizes host and tumor immunity to improve therapeutic efficacy in murine lung cancer
Source: PubMed Central journal article supplement — Int J Oncol. 2022 May 12;61(1):81. doi: 10.3892/ijo.2022.5371 (PMC9162053; doi:10.3892/ijo.2022.5371), 2022-05-12

Figure S1. Flow cytometry gating strategy for the detection immune cells in subcutaneous Lewis lung carcinoma tumors.

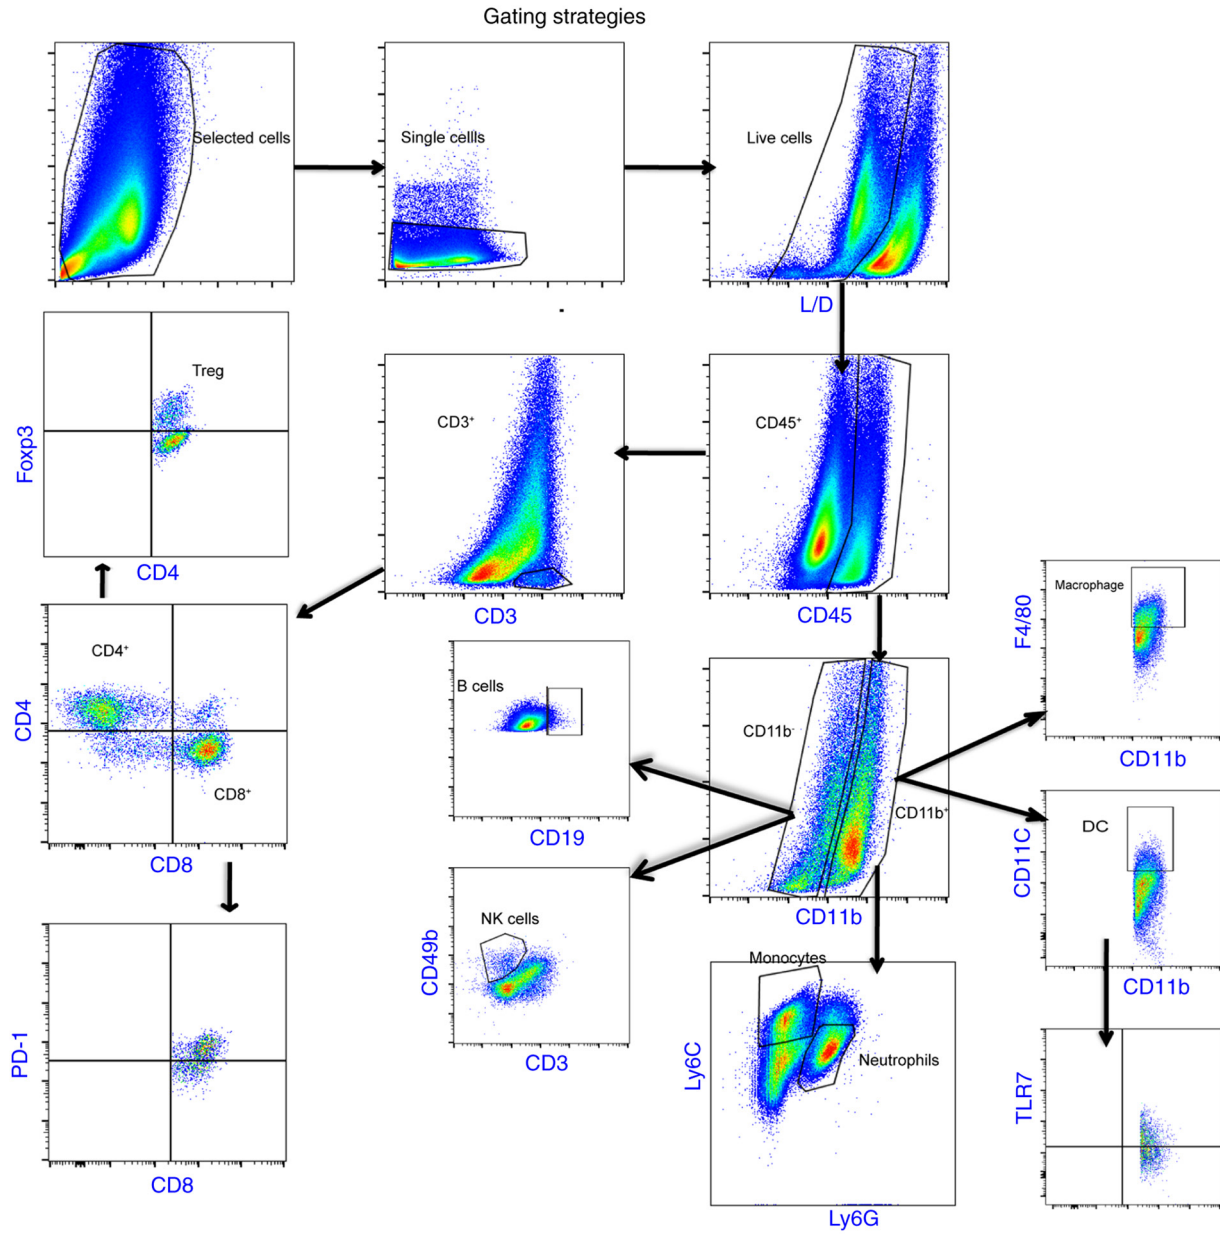

Figure S2. R848 treatment in NK-, CD4<sup>+</sup> T cell- or CD8<sup>+</sup> T cell-depleted mice with Lewis lung carcinoma subcutaneous tumors. (A) Tumor volumes were recorded following depletion of NK cell and CD4<sup>+</sup> T cells (NK group, n=5; CD4<sup>+</sup> T group, n=8-10). (B and C) A total of 1x10<sup>6</sup> CD8<sup>+</sup> T cells were isolated from OT1 transgenic mice and added to DC-NK co-cultures for 3 days in the presence of R848 or PBS. (B) CD8<sup>+</sup> T cell proliferation and (C) the frequency of IFN- $\gamma$ <sup>+</sup>CD8<sup>+</sup> T cells were detected using flow cytometry. (D) Tumor weight and (E) survival of the mice following CD4<sup>+</sup> T and CD8<sup>+</sup> T cell depletion (n=8-10). \*P<0.05, \*\*P<0.01 and \*\*\*P<0.001 compared with the PBS control group. R848, resiquimod; NK, natural killer; DC, dendritic cells; NS, not significant.

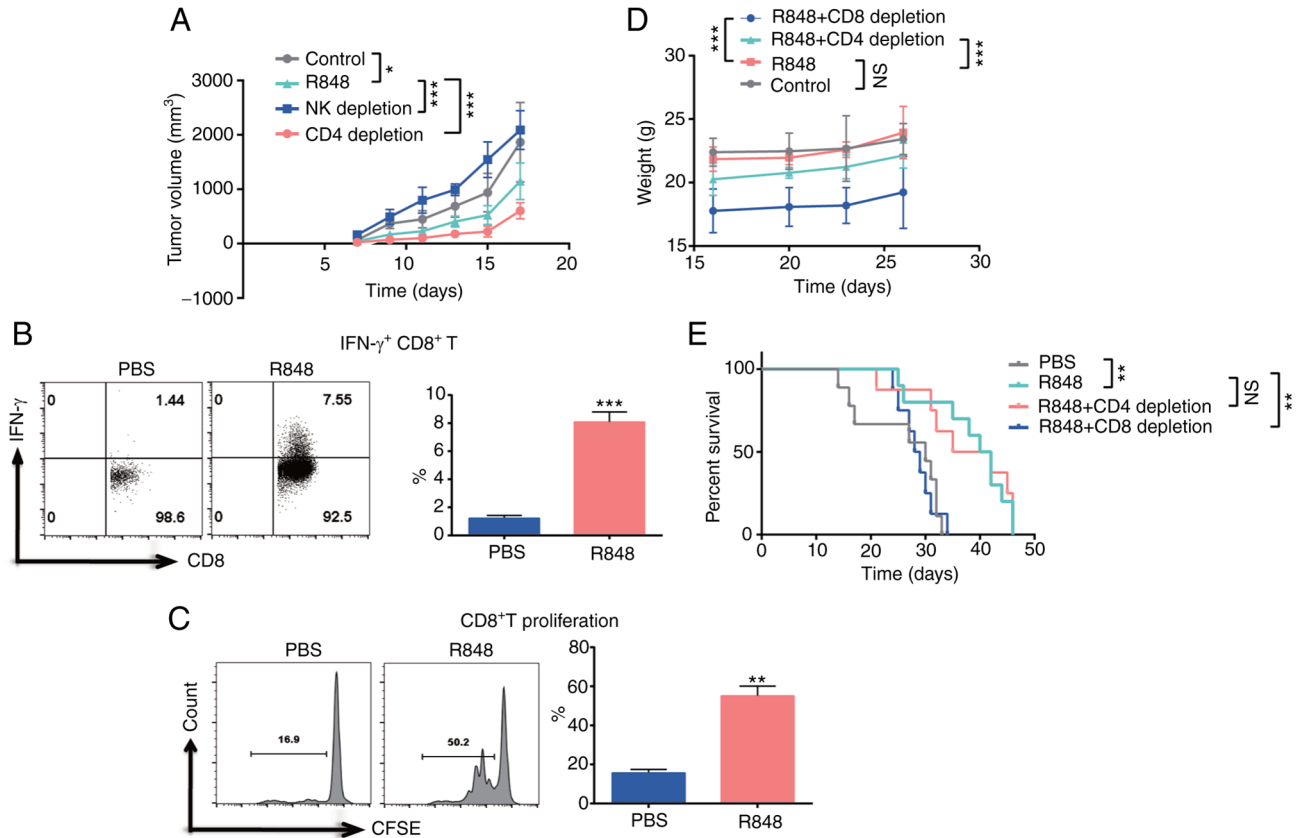

Supplement: Supplementary_Data.pdf [file Supplementary_Data.pdf]
